# Supplementary material
Source: ML conference proceedings conference paper supplement (https://proceedings.neurips.cc/paper_files/paper/2014/hash/26dd0dbc6e3f4c8043749885523d6a25-Abstract.html)
Supplement: Supplementary file [file 26dd0dbc6e3f4c8043749885523d6a25-Supplemental.zip]

## Supplementary Material

### A Miscellaneous proofs

#### A.1 Proof of Corollary 3.2

The proof is standard and uses the self-reducibility of the hard-core model, meaning that conditioning on  $\sigma_i = 0$  amounts to removing node  $i$  from the graph. Fix a graph  $G$  and parameters  $\theta = \mathbf{0}$ . We show that given an algorithm to approximately compute the marginals for induced subgraphs  $H \subseteq G$ , it is possible to approximate the partition function  $e^{\Phi(\mathbf{0})}$ , denoted here by  $Z$ . We first claim that

$$Z = \prod_{i=1}^p \frac{1}{1 - \mu_i(G \setminus [i-1])}. \quad (\text{A.1})$$

The graph  $G \setminus [i-1]$  is obtained by removing nodes labeled  $1, 2, \dots, i-1$ , and  $\mu_i(G \setminus [i-1])$  is the marginal at node  $i$  for this graph. We use induction on the number of nodes. The base case with one node is trivial:  $Z = 1 + e^0 = 2 = 1/(1 - \mu)$ . Suppose now that the formula (A.1) holds for graphs on  $k$  nodes and that  $|V| = k+1$ . Let  $Z_0$  and  $Z_1$  denote the partition function summation restricted to  $\sigma_1 = 0$  or  $\sigma_1 = 1$ , respectively. Thus

$$Z = Z_0 + Z_1 = Z_0 \left( \frac{Z_0 + Z_1}{Z_0} \right) = \frac{Z_0}{1 - \mu_1}.$$

Now  $Z_0$  is the partition function of a new graph obtained by deleting vertex  $i$ , and the inductive assumption proves the formula.

From (A.1) we see that in order to compute a  $\gamma$ -approximation to  $Z^{-1}$ , it suffices to compute a  $\gamma/p$  approximation to each of the marginals. Now for small  $\gamma$ , a  $\gamma$  approximation to  $Z^{-1}$  gives a  $2\gamma$  approximation to  $Z$ , and this completes the proof.

#### A.2 Proof of Lemma 4.2

We wish to show that  $\mu(\mathbf{0}) \in \mathcal{M}_1$  for a graph  $G = (V, E)$  of maximum degree  $d$  and  $p \geq 2^{d+1}$ . Consider a particular node  $i \in V$  with neighbors  $N(i)$ , and let  $d_i = |N(i)|$  denote its degree. We use the notation  $S_i, S_i^-, S_i^\circ$  defined in Subsection 5.1. A collection of independent set vectors  $S \subseteq \mathcal{I}(G)$  is assigned probability  $P(S) = |S|/|\mathcal{I}(G)|$  for our choice  $\theta = \mathbf{0}$ , so it suffices to argue about cardinalities.

We first claim that  $|S_i| \geq 2^{-d}|S_i^\circ|$ . This follows by observing that each set in  $S_i^\circ$  gets mapped to a set in  $S_i$  by removing the neighbors  $N_i$ , and moreover at most  $2^d$  sets are mapped to the same set in  $S_i$ . Next, we note that  $|S_i| = |S_i^-|$  since the removal of node  $i$  is a bijection from  $S_i$  to  $S_i^-$  and hence they are of the same cardinality. Combining these observations with the fact that  $P(S_i) + P(S_i^-) + P(S_i^\circ) = 1$ , we get the estimate  $\mu_i = P(S_i) \geq 1/(2^{-d} + 2) \geq 2^{-d-1}$ .

Next, we show for each coordinate  $i$  that the vector  $\mu' = \mu + 2^{-d-1}e_i$  is in  $\mathcal{M}$ , which will complete the proof that  $\mu(\mathbf{0})$  is  $\mathcal{M}_1$ . Let  $\eta_\sigma = P_0(\sigma)$  denote the probability assigned to  $\sigma$  under the distribution with parameters  $\theta = \mathbf{0}$ , so that  $\mu = \sum_{\sigma \in \mathcal{I}(G)} \eta_\sigma \cdot \sigma$ . Similarly to the proof of Lemma 5.2, we define a new probability measure

$$\eta'_\sigma = \begin{cases} \eta_\sigma + 2^{-d-1} & \text{if } \sigma \in S_i \\ \eta_\sigma - 2^{-d-1} & \text{if } \sigma \in S_i^- \\ \eta_\sigma & \text{otherwise.} \end{cases}$$

This is a valid probability distribution because  $\eta_\sigma \geq 2^{-d-1}$  for  $\sigma \in S_i^-$ . One can check that  $\mu' = \sum_{\sigma \in \mathcal{I}} \eta'_\sigma \sigma$  has  $\mu'_j = \mu_j$  for each  $j \neq i$  and  $\mu'_i = \mu_i + 2^{-d-1}$ . The point  $\mu'$ , being a convex combination of independent set vectors, must be in  $\mathcal{M}$ , and hence so must  $\mu + 2^{-d-1}e_i$ .

## B Proofs for projected gradient method

### B.1 Proof of Lemma 4.4

The proof here is a slight modification of the proof of Theorem 3.1 in [22].

Observe first that if  $\mathcal{P}$  is the projection onto a convex set, then  $\mathcal{P}$  is a contraction:  $\|\mathcal{P}(x) - \mathcal{P}(y)\|_2 \leq \|x - y\|_2$  (cf. Prop 2.1.3 in [24]). Using the the convexity inequality  $G(x) - G(x^*) \leq \nabla G(x)^T(x - x^*)$ , the definition  $\eta = \sup_{x \in C} \|\widehat{\nabla G}(x) - \nabla G(x)\|_1$ , and the update formula  $x^{t+1} = x^t - s\widehat{\nabla G}(x^t)$ , it follows that

$$\begin{aligned} G(x^t) - G(x^*) &\leq \nabla G(x^t)^T(x^t - x^*) \\ &= \widehat{\nabla G}(x^t)^T(x^t - x^*) + (\widehat{\nabla G}(x^t)^T - \nabla G(x^t)^T)(x^t - x^*) \\ &\leq \widehat{\nabla G}(x^t)^T(x^t - x^*) + \eta\|x^t - x^*\|_\infty \\ &= \frac{1}{s}(x^t - x^{t+1})^T(x^t - x^*) + \eta \\ &= \frac{1}{2s}(\|x^t - x^*\|_2^2 + \|x^t - x^{t+1}\|_2^2 - \|x^{t+1} - x^*\|_2^2) + \eta \\ &= \frac{1}{2s}(\|x^t - x^*\|_2^2 - \|x^{t+1} - x^*\|_2^2) + \frac{s}{2}\|\widehat{\nabla G}(x^t)\|_2^2 + \eta. \end{aligned}$$

Adding the preceding inequality for  $t = 1$  to  $t = T$ , the sum telescopes and we get

$$\sum_{t=1}^T [G(x^t) - G(x^*)] \leq \frac{R^2}{2s} + \frac{s}{2}L^2T + \eta T = RL\sqrt{T} + \eta T. \quad (\text{B.1})$$

Here we used the definitions  $R = \|x^1 - x^*\|$  and  $L = \sup_{x \in C} \|\widehat{\nabla G}(x)\|$  and the last equality is by the choice  $s = \frac{R}{L\sqrt{T}}$ . Now defining  $\bar{x}^T = \frac{1}{T} \sum_{t=1}^T x^t$ , dividing (B.1) through by  $T$  and using the convexity of  $G$  to apply Jensen's inequality gives

$$G(\bar{x}^T) - G(x^*) \leq \frac{RL}{\sqrt{T}} + \eta.$$

Thus in order to make the right hand side smaller than  $\delta$  it suffices to take  $T = 4R^2L^2/\delta^2$  and  $\eta = \delta/2$ .

### B.2 Proof of Lemma 4.5

We start by showing that the gradient  $\nabla \Phi$  is  $p^{\frac{3}{2}}$ -Lipschitz. Recall that  $\nabla \Phi(\theta) = \mu(\theta)$ . We prove a bound on  $|\mu_i(\theta) - \mu_i(\theta')|$  by changing one coordinate of  $\theta$  at a time. Let  $\theta^{(r)} = (\theta_1, \dots, \theta_r, \theta'_{r+1}, \dots, \theta'_p)$ . The triangle inequality gives

$$|\mu_i(\theta) - \mu_i(\theta')| = \sum_{r=0}^{p-1} |\mu_i(\theta^{(r)}) - \mu_i(\theta^{(r+1)})|.$$

A direct calculation shows that

$$\frac{\partial}{\partial \theta_r} \mu_i(\theta) = \mathbb{P}(\sigma_i = \sigma_r = 1) - \mu_i(\theta) \mu_r(\theta).$$

Since this is uniformly bounded by one in absolute value, we obtain the inequality  $|\mu_i(\theta) - \mu_i(\theta')| \leq \|\theta - \theta'\|_1$  or

$$\|\mu(\theta) - \mu(\theta')\|_1 \leq p\|\theta - \theta'\|_1$$

Hence

$$\|\mu(\theta) - \mu(\theta')\|_2 \leq \|\mu(\theta) - \mu(\theta')\|_1 \leq p\|\theta - \theta'\|_1 \leq p^{\frac{3}{2}}\|\theta - \theta'\|_2,$$

i.e.,  $\nabla \Phi$  is  $p^{\frac{3}{2}}$ -Lipschitz.

Now the function  $\nabla\Phi$  being  $p^{\frac{3}{2}}$ -Lipschitz implies that  $\Phi$  is  $p^{\frac{3}{2}}$ -strongly smooth, where  $\Phi$  is  $\beta$ -strongly smooth if

$$\Phi(x + \Delta) - \Phi(x) \leq \langle \nabla\Phi(x), \Delta \rangle + \frac{1}{2}\beta\|\Delta\|^2.$$

To see this, we write

$$\begin{aligned} \Phi(x + \Delta) - \Phi(x) &= \int_0^1 \langle \nabla\Phi(x + \tau\Delta), \Delta \rangle d\tau = \langle \nabla\Phi(x), \Delta \rangle + \int_0^1 (\nabla\Phi(x + \tau\Delta) - \nabla\Phi(x)) d\tau \\ &\leq \langle \nabla\Phi(x), \Delta \rangle + p^{\frac{3}{2}} \int_0^1 \langle \tau\Delta, \Delta \rangle d\tau \\ &= \langle \nabla\Phi(x), \Delta \rangle + \frac{1}{2}p^{\frac{3}{2}}\|\Delta\|^2. \end{aligned}$$

Now Theorem 6 from [25] or Chapter 5 of [26] imply that  $\Phi^*$ , being the Fenchel conjugate of  $\Phi$ , is  $p^{-\frac{3}{2}}$ -strongly convex, meaning

$$\Phi^*(x + \Delta) - \Phi^*(x) \geq \langle \nabla\Phi^*(x), \Delta \rangle + \frac{1}{2}p^{-\frac{3}{2}}\|\Delta\|^2.$$

This gives the desired bound on  $\|x - x^*\|$  in terms of  $\Phi^*(x) - \Phi^*(x^*)$ .

## C Proofs of gradient bounds

### C.1 Proof of Lemma 5.3

We suppose for the sake of deriving a contradiction that  $\theta_i > p/\delta$ . Let  $\bar{\mu} = \mu + \delta \cdot e_i$ , and let  $\eta'$  be a probability measure such that  $\bar{\mu} = \sum_{\sigma \in \mathcal{I}} \eta'_\sigma \sigma$ . Now  $\eta'(S_i) = \bar{\mu}_i \geq \delta$ , and we define the non-negative measure  $\gamma$  (summing to less than one) with support  $S_i$  as

$$\gamma_\sigma = \begin{cases} \eta'_\sigma \cdot \frac{\delta}{\eta'(S_i)} & \text{if } \sigma \in S_i \\ 0 & \text{otherwise.} \end{cases}$$

In this way,  $\gamma_\sigma \leq \eta'_\sigma$  and  $\gamma(S_i) = \delta$ . We define a new probability measure

$$\eta_\sigma = \begin{cases} \eta'_\sigma - \gamma_\sigma & \text{if } \sigma \in S_i \\ \eta'_\sigma + \gamma_{\sigma \cup \{i\}} & \text{if } \sigma \in S_i^- \\ \eta'_\sigma & \text{otherwise,} \end{cases} \quad (\text{C.1})$$

and one may check that  $\mu = \sum_{\sigma \in \mathcal{I}} \eta_\sigma \sigma$  and  $\eta(S_i^-) \geq \gamma(S_i) = \delta$ . We use the definitions in Subsection 5.1 to get

$$\begin{aligned} F_\mu(\theta) &\triangleq \mu \cdot \theta - \log \left( \sum_{\sigma \in \mathcal{I}} \exp(\sigma \cdot \theta) \right) \\ &= \sum_{\rho \in \mathcal{I}} \eta_\rho \log \frac{\exp(\rho \cdot \theta)}{\sum_{\sigma} \exp(\sigma \cdot \theta)} \\ &\stackrel{(a)}{\leq} \sum_{\rho \in S_i^-} \eta_\rho \log \frac{\exp(\rho \cdot \theta)}{f(S_i^-) + e^{\theta_i} f(S_i^-) + f(S_i^\odot)} \\ &\stackrel{(b)}{\leq} \sum_{\rho \in S_i^-} \eta_\rho \log \frac{f(S_i^-)}{e^{\theta_i} f(S_i^-)} \\ &\leq -\eta(S_i^-) \theta_i \stackrel{(c)}{\leq} -p \stackrel{(d)}{\leq} -\log |\mathcal{I}| = F(\mathbf{0}). \end{aligned}$$

Here (a) follows by restricting the sum to  $S_i^- \subseteq \mathcal{I}(G)$  and from the fact that  $\sum_{\sigma} \exp(\sigma \cdot \theta) = f(S_i^-) + e^{\theta_i} f(S_i^-) + f(S_i^\odot)$ , (b) follows by retaining only the term  $e^{\theta_i} f(S_i^-)$  in the denominator and replacing  $\exp(\rho \cdot \theta)$  for  $\rho \in S_i^-$  with  $f(S_i^-) = \sum_{\rho \in S_i^-} \exp(\rho \cdot \theta)$ , thereby increasing the argument to the logarithm, (c) uses the fact that  $\eta(S_i^-) \geq \delta$  and the assumption that  $\theta_i > p/\delta$ , and (d) follows from the crude bound on number of independent sets  $|\mathcal{I}| \leq 2^p$  and  $\log 2 < 1$ .

Finally, the relation  $\theta(\mu) = \arg \max_{\theta} F_\mu(\theta)$  from Section 3 contradicts  $F_\mu(\theta) < F(\mathbf{0})$ .

## C.2 Proof of Lemma 5.4

We suppose for the sake of contradiction that  $\theta_i < -p/\delta$  and show that  $\theta$  cannot be the vector of canonical parameters corresponding to  $\mu$ .

Since  $\mu \in \mathcal{M}$ , there exists a non-negative measure  $\eta$  so that  $\mu = \sum_{\sigma \in \mathcal{I}} \eta_\sigma \sigma$ , and furthermore  $\eta(S_i) = \mu_i \geq \delta$ . Now arguments similar to the proof of Lemma 5.3 above give

$$\begin{aligned}
F_\mu(\theta) &= \mu \cdot \theta - \log \left( \sum_{\sigma} \exp(\sigma \cdot \theta) \right) \\
&= \sum_{\rho \in \mathcal{I}} \eta_\rho \log \frac{\exp(\rho \cdot \theta)}{\sum_{\sigma} \exp(\sigma \cdot \theta)} \\
&\leq \sum_{\rho \in S_i} \eta_\rho \log \frac{\exp(\rho \cdot \theta)}{f(S_i^-) + e^{\theta_i} f(S_i^-) + f(S_i^*)} \\
&\leq \sum_{\rho \in S_i} \eta_\rho \log \frac{e^{\theta_i} f(S_i^-)}{f(S_i^-) + e^{\theta_i} f(S_i^-) + f(S_i^*)} \\
&\leq \sum_{\rho \in S_i} \eta_\rho \theta_i = \eta(S_i) \theta_i < -\delta p / \delta = -p \leq -\log |\mathcal{I}| = F(\mathbf{0}).
\end{aligned}$$

As before, this contradicts the relation  $\theta(\mu) = \arg \max_{\theta} F_\mu(\theta)$ .

## D Proof of Proposition 4.6

Starting with  $x^t$  in  $\mathcal{M}_1$ , our goal is to show that  $x^{t+1} = \mathcal{P}_{\geq}(x^t - s\hat{\theta}(x^t))$  remains in  $\mathcal{M}_1$ . The proof will then follow by induction, because our initial point  $x^1$  is in  $\mathcal{M}_1$  by the hypothesis.

We will use the fact that all hyperplane constraints for  $\mathcal{M}$ , except for the non-negativity constraints  $x_i \geq 0$ , can be written as  $\langle h, x \rangle \leq 1$  for a vector  $h \in [0, 1]^p$ . This can be justified using the fact that  $e_i \in \mathcal{M}$  for each  $i$  together with the property that for any  $\mu \in \mathcal{M}$ , any coordinate of  $\mu$  can be set to zero while remaining in  $\mathcal{M}$ .

Given our current iterate  $x^t$ , we call a constraint  $\langle h, x \rangle \leq 1$  *active* if

$$1 - 2\epsilon \|h\|_{\infty} < \langle h, x^t \rangle \leq 1 - \epsilon \|h\|_{\infty} \quad (\text{D.1})$$

and *critical* if

$$1 - \epsilon \|h\|_{\infty} < \langle h, x^t \rangle. \quad (\text{D.2})$$

Observe that an active constraint has a coordinate  $i$  (namely  $i$  with  $h_i = \|h\|_{\infty}$ ) with  $\langle h, x^t + 2\epsilon \cdot e_i \rangle = \langle h, x^t \rangle + 2h_i\epsilon > 1$  and similarly a critical constraint has a coordinate  $i$  with  $\langle h, x^t + \epsilon \cdot e_i \rangle = \langle h, x^t \rangle + h_i\epsilon > 1$ .

For  $x^t \in \mathcal{M}_1$  there are (by definition) no critical constraints, but there may be active constraints. We will first show that inactive constraints can at worst become active for the next iterate  $x^{t+1}$ , which requires only that the step-size is not too large relative to the magnitude of the gradient. Then we show that the active constraints have a repulsive property and that  $x^{t+1}$  is no closer than  $x^t$  to any active constraint, that is,  $\langle h, x^{t+1} \rangle \leq \langle h, x^t \rangle$ . Thus, if  $x^t$  is in  $\mathcal{M}_1$ , then there are no critical constraints for  $x^{t+1}$  and every coordinate  $i$  satisfies  $\langle h, x^{t+1} + \epsilon \cdot e_i \rangle \leq 1$  for all constraint vectors  $h$ . Since the projection  $\mathcal{P}_{\geq}$  ensures that  $x_i^{t+1} \geq q\epsilon$ , the update  $x^{t+1}$  is in  $\mathcal{M}_1$ . We now focus on inactive constraints.

**Inactive constraint.** We consider an inactive constraint  $h$ , meaning that  $\langle h, x^t \rangle + 2\epsilon \|h\|_{\infty} \leq 1$ . By assumption the step size  $s = (\frac{\epsilon}{2p})^2$  so the increment in any coordinate  $j$  is bounded as

$$\begin{aligned}
x_j^{t+1} - x_j^t &\leq s |\hat{\theta}_j(x^t)| \\
&\leq s |\hat{\theta}_j(x^t) - \theta_j(x^t)| + s |\theta_j(x^t)| \\
&\leq (1 + \gamma) s |\theta_j(x^t)| \\
&\leq \epsilon/p
\end{aligned}$$

using Lemma 5.3 and fact that  $\gamma \leq 1$ . These bounds give

$$\begin{aligned} \langle h, x^{t+1} \rangle &= \langle h, x^t \rangle + \langle h, x^{t+1} - x^t \rangle \leq \langle h, x^t \rangle + \sum_j h_j (x_j^{t+1} - x_j^t) \\ &\leq \langle h, x^t \rangle + p(\epsilon/p) \|h\|_\infty \leq 1 - \epsilon \|h\|_\infty \end{aligned}$$

which shows that the constraint is not critical for  $x^{t+1}$  and at worst becomes active.

**Active constraint.** The rough idea is that if a coordinate  $i$  cannot be increased by  $2\epsilon$  while remaining in  $\mathcal{M}$ , then the parameter  $\theta_i$  must be sufficiently large, and the next iterate  $x^{t+1}$  will decrease enough to overcome the possible increase in other coordinates. This argument does not work, however, because it might be the case that  $x_i^t = q\epsilon$ , which prevents any decrease (i.e.,  $x_i^{t+1} \geq x_i^t$ ) due to the projection  $\mathcal{P}_\geq$ . Instead, we start by showing that if *some* coordinate cannot be increased by  $2\epsilon$ , then there must be a *reasonably large* coordinate which cannot be increased by  $4p\epsilon$ .

**Lemma D.1.** *If  $h$  is an active constraint, then there is a coordinate  $\ell \in V$  with  $x^\ell + (4p\epsilon)e_\ell \notin \mathcal{M}$  and  $x_\ell^t \geq 2q\epsilon$ .*

*Proof.* If  $h$  is active then  $1 - 2\epsilon \|h\|_\infty < \langle h, x^t \rangle$ . Using the fact that  $h_j \leq 1$  for all  $j$  we have

$$1 - 2\epsilon \leq 1 - 2\epsilon \|h\|_\infty < \langle h, x^t \rangle. \quad (\text{D.3})$$

Let  $B \subseteq V$  consist of coordinates  $j$  with small entries  $x_j^t \leq 2\epsilon q$ . Then

$$\langle h, x^t \rangle = \sum_{j \in B} h_j x_j^t + \sum_{j \in B^c} h_j x_j^t \leq |B|(2\epsilon q) + \sum_{j \in B^c} h_j x_j^t \leq \frac{2}{p} + \sum_{j \in B^c} h_j x_j^t. \quad (\text{D.4})$$

The last inequality used the crude estimate  $|B| \leq p$ . Combining (D.3) and (D.4) and rearranging gives

$$\sum_{j \in B^c} h_j x_j^t \geq 1 - 2\epsilon - 2/p \geq 1 - 3/p,$$

and it follows that there is an  $\ell \in B^c$  for which  $h_\ell \geq h_\ell x_\ell^t \geq 1/2p$ . Adding  $h_\ell \cdot (4p\epsilon) \geq 2\epsilon$  to both sides of (D.3) shows that  $x^\ell + (4p\epsilon)e_\ell$  violates the inequality  $\langle h, x \rangle \leq 1$ . This proves the lemma, since  $x_\ell^t > 2q\epsilon$  for  $\ell \in B^c$ .  $\square$

We are now ready to prove that  $\langle h, x^{t+1} \rangle \leq \langle h, x^t \rangle$ . Let  $\ell$  be the coordinate promised by Lemma D.1, with  $x^\ell + (4p\epsilon)e_\ell \notin \mathcal{M}$  and  $x_\ell^t \geq 2q\epsilon$ . From Lemma 5.2, we know that  $\theta_\ell(x^t) \geq \log(\frac{q}{4p} - 1) \geq 3 \log p$ , for  $p$  large enough. By definition of  $\hat{\theta}$  being a  $\gamma$ -approximation to  $\theta$ ,  $\hat{\theta}_\ell(x^t) \geq (1 - \gamma)\theta_\ell(x^t)$ . Therefore, since  $\gamma \rightarrow 0$  as  $p \rightarrow \infty$ , it follows that for  $p$  large enough  $\hat{\theta}_\ell(x^t) \geq \log p$ . This implies

$$x_\ell^{t+1} - x_\ell^t \leq -\min(s\hat{\theta}(x^t), s \log p) \leq -s \log p. \quad (\text{D.5})$$

Here we used the fact that  $x_\ell^t \geq q\epsilon + s \log p$  so the projection  $\mathcal{P}_\geq$  does not affect this coordinate.

Denote by  $D$  the set of coordinates

$$D = \{j \in [p] : \langle h, x^t \rangle + \frac{q}{2}\epsilon h_j > 1\}.$$

These coordinates have non-positive increment: since  $x_j \geq q\epsilon$  for  $x \in \mathcal{M}_1$ , Lemma 5.1 implies that  $\theta_j \geq 0$ , and hence  $\hat{\theta}_j \geq (1 - \gamma)\theta_j \geq 0$ , or

$$x_j^{t+1} - x_j^t \leq 0 \quad \text{for } j \in D.$$

In contrast, coordinates in  $D^c$  might increase, but by a limited amount: since  $x^t \in \mathcal{M}_1$ , all coordinates  $j \in D^c$  satisfy  $x_j^t \geq q\epsilon$ , and Lemma 5.4 gives the bound  $\theta_j \geq -p/q\epsilon$ , or

$$x_j^{t+1} - x_j^t \leq (1 + \gamma)|-s\theta_j| \leq 2sp/q\epsilon \quad \text{for all } j \in D^c. \quad (\text{D.6})$$

Additionally, by the definition of  $D$  and the fact that increasing coordinate  $\ell$  by  $4p\epsilon$  violates  $\langle h, x \rangle \leq 1$ , if  $j \in D^c$ , then  $4p\epsilon h_\ell > q\epsilon h_j/2$ , or

$$h_j < 8ph_\ell/q \quad \text{for all } j \in D^c. \quad (\text{D.7})$$

Using the crude bound  $|D^c| \leq p$  together with (D.6) and (D.7) gives

$$\sum_{j \in D^c} h_j(x_j^{t+1} - x_j^t) \leq |D^c| \frac{8ph_\ell}{q} \cdot \frac{2sp}{q\epsilon} \leq s \frac{4p^2}{q^2\epsilon} h_\ell \leq 4sh_\ell. \quad (\text{D.8})$$

Counting the contributions from  $D^c$  in (D.8) in addition to  $D$  (none) and  $\ell$  (negative as per (D.5)), it follows that

$$\begin{aligned} \langle c, x^{t+1} \rangle &= \langle h, x^t \rangle + \langle h, x^{t+1} - x^t \rangle \leq \langle h, x^t \rangle + sh_\ell(4 - \theta_\ell) \\ &\leq \langle h, x^t \rangle + sh_\ell(4 - \ln p) \\ &\leq \langle h, x^t \rangle. \end{aligned}$$

Here we have used the fact that  $p$  is large enough ( $p \geq e^4$  suffices for this last step). In words, we move away from any active hyperplane constraint. This completes the proof.
